# Supplementary material
Source: PubMed Central journal article supplement (PMC4313294)
Supplement: JCM.02397-14_zjm999093879so1.pdf [file JCM.02397-14_zjm999093879so1.pdf]

Supplementary table: Primers included in the enrichment PCRs\*

| Primer name                                                              | Specificity                     | Sequence**                               |
|--------------------------------------------------------------------------|---------------------------------|------------------------------------------|
| Primers included in the enrichment PCR for PPSV 23 and related serotypes |                                 |                                          |
| 1Forward                                                                 | Serotype 1                      | GGG ACT TTA ATT TTA TGC AGT<br>G         |
| 1Reverse                                                                 | Serotype 1                      | CAC AAT GGC TTT AGA AGG TAG<br>AG        |
| 2Forward                                                                 | Serotype 2                      | CGG CAT TGT ATT CTT TAT ATC G            |
| 2Reverse                                                                 | Serotype 2                      | CGT TTG TAT CCA TTT AAC TGC<br>ATC       |
| 3Forward                                                                 | Serotype 3                      | TTG ATA TTC CCC TTG ACA ATA G            |
| 3Reverse                                                                 | Serotype 3                      | GGA GGC TTC AAG ATT CAA CTC              |
| 4Forward                                                                 | Serotype 4                      | CCG TCT ATA TTT ATA TGG GTT<br>TGC       |
| 4Reverse                                                                 | Serotype 4                      | CCT GAT AAT TTT GTA CTT CTG<br>AAT G     |
| 5Forward                                                                 | Serotype 5                      | GTT TTC CCA ATA GTA GTT TGC<br>G         |
| 5Reverse                                                                 | Serotype 5                      | CCC ACA GCC AAA TAG AGT TG               |
| 6B6AForward                                                              | Serogroup 6 (6A, 6B,<br>6C, 6D) | TCA ACC TGC AGT AAT TTT AAC<br>A         |
| 6B6AReverse                                                              | Serogroup 6 (6A, 6B,<br>6C, 6D) | CTA CTT TCT GAA TTT CAC GGA<br>TAT AAA G |
| 7F7AForward                                                              | Serotypes 7F, 7A                | GCA AGT GTT TCA ATG GGA GTA              |
| 7F7AReverse                                                              | Serotypes 7F, 7A                | ACG GAG GGA CCA TAC AAT AAG              |
| 8Forward                                                                 | Serotype 8                      | GAT GTT AGT TTC TTC GAT TCC<br>AG        |
| 8Reverse                                                                 | Serotype 8                      | TCA TAA TGA ATC GTA CCA ATC<br>AAC       |
| 9N9LForward                                                              | Serotypes 9N, 9L                | TCA ATG GCG ACT TTA TTT GC               |
| 9N9LReverse                                                              | Serotypes 9N, 9L                | AGT CTA TTA TCT CCT GTA GGG<br>TGC       |
| 9V9AForward                                                              | Serotypes 9V, 9A                | AAC TAT ATT TAC CCT ACT CTC<br>CAC AG    |
| 9V9AReverse                                                              | Serotypes 9V, 9A                | ACC GGA AAA AGC AAT TGA G                |
| 10A10BForward                                                            | Serotypes 10A, 10B              | TGA GCT ATT TAA GGA CCT GGG              |
| 10A10BReverse                                                            | Serotypes 10A, 10B              | GCA AGC GTC ACT TTC TTG A                |
| 11A11DForward                                                            | Serotypes 11A 11D               | GAA ATA TCG CCA TTC ATC AG               |

|               |                                  |                                      |
|---------------|----------------------------------|--------------------------------------|
| 11A11DReverse | Serotypes 11A, 11D               | CAA CAG CAA CTG TGC CAC T            |
| 124446Forward | Serotypes 12F,<br>12A,12B, 44,46 | TGA ATA TGG ACG GTG GAG              |
| 124446Reverse | Serotypes 12F,<br>12A,12B, 44,46 | AGC AAA GAA AGC CGA AAG              |
| 14Forward     | Serotype 14                      | CCT ACT TCC AAA ACA GTT TAT<br>GC    |
| 14Reverse     | Serotype 14                      | GTC AAT ATT GAT TGG CAT TTT C        |
| 15B15CForward | Serotypes 15B, 15C               | TAA TAA GCG GAT GAT TGT AGC<br>G     |
| 15B15CReverse | Serotypes 15B, 15C               | TAT ACT GAT TAA CTT TCC AGA<br>TGG G |
| 17FForward    | Serotype 17F                     | AGA GGG ATT GTT GAA GGT ATT<br>C     |
| 17FReverse    | Serotype 17F                     | AGT AGT CTC GCA TTT CTA TCA<br>TCC   |
| 18Forward     | Serogroup 18                     | AAT TGT TCT TTT CCT GTA CTC<br>AGT C |
| 18Reverse     | Serogroup 18                     | CGA ACC ATT GAA ACT ATC ATC<br>TG    |
| 19AForward    | Serotype 19A                     | TGT ATT TGC CCT TAT TAA TGT<br>GC    |
| 19AReverse    | Serotype 19A                     | AAG TGC AAG ATT ATG AAT CTC<br>TCT C |
| 19FForward    | Serotype 19F                     | TCA GTA TTT GCA CTG GTT AAT<br>TC    |
| 19FReverse    | Serotype 19F                     | AAG AAC AAG GTT GTA TAT TTC<br>CTT C |
| 20Forward     | Serotype 20                      | CTT TAT CAG GAA TAC GCC AAT<br>C     |
| 20Reverse     | Serotype 20                      | CTG TAT AAT AAC GAG AAC CAA<br>CG    |
| 22F22AForward | Serotypes 22F, 22A               | AGG ATG CAG TAG ATA CCA GTG<br>G     |
| 22F22AReverse | Serotypes 22F, 22A               | TAT AAA CGG AGG TTG TTG TCC          |
| 23FForward    | Serotype 23F                     | TGA TAG TGA ACT TGG GAT TGT<br>C     |
| 23FReverse    | Serotype 23F                     | CTT TAT CGG TAA GGT GGA TAA          |

|                                                                     |                                |                                          |
|---------------------------------------------------------------------|--------------------------------|------------------------------------------|
|                                                                     |                                | G                                        |
| 33F33A37Forward                                                     | Serotypes 33F,33A,<br>37       | TCA ACT AGT CAA GGA TTT GAT<br>GG        |
| 33F33A37Reverse                                                     | Serotypes 33F,33A,<br>37       | CGT ATC AGA TTT GCG ATT TC               |
| Primers included in the enrichment PCR for the additional serotypes |                                |                                          |
| 7B7C40Forward                                                       | Serotypes 7B, 7C,<br>and 40    | AAA ACT CAA GTA TCT GTG YCA<br>CCT T     |
| 7B7C40Reverse                                                       | Serotypes 7B, 7C,<br>and 40    | CAT CTC TAT TCG ACC TTG CGT<br>TA        |
| 10F10CForward                                                       | Serotypes 10F and<br>10C       | TAG TTT TGG TTA CGT AGT TGT<br>TGA CT    |
| 10F10CReverse                                                       | Serotypes 10F and<br>10C       | GCA ATR AAT ACT GTA GCA TAC<br>GAT AGT T |
| 11F11A11DForward                                                    | Serotypes 11F, 11A,<br>and 11D | GAA ATA TCG CCA TTC ATC AG               |
| 11FReverse                                                          | Serotype 11F                   | GAT TGT ACC CCA TCA CCG                  |
| 11B11CForward                                                       | Serotypes 11B and<br>11C       | TCT GGT GCT AAG GGG ATC AA               |
| 11B11CReverse                                                       | Serotypes 11B and<br>11C       | CCA ATT ACT CCA TTA TCT ATT<br>GCT AAT   |
| 13Forward                                                           | Serotype 13                    | GAT GGG AAA ATA CGA TAT GCT<br>C         |
| 13Reverse                                                           | Serotype 13                    | GAA AAT CGT AAC ATG GAA AAA<br>GTA A     |
| 15F15AForward                                                       | Serotypes 15F and<br>15A       | TAT TTC CTT CCT ATG GGA CAA<br>C         |
| 15F15AReverse                                                       | Serotypes 15F and<br>15A       | GCA AGC ATT TTA CCA AGT TCA<br>TAA A     |
| 16FForward                                                          | Serotype 16F                   | TTG TTC TTA CAT TTA GCC GTA<br>GTG       |
| 16FReverse                                                          | Serotype 16F                   | TCG TCG TTG AAA ACA ATT TCT<br>TAC       |
| 16AForward                                                          | Serotype 16A                   | CCG CTC ACG GTA TGG ACT A                |
| 16AReverse                                                          | Serotype 16A                   | CCA GCA ATA TAC TCA GGA AAT<br>AAT TC    |
| 17AForward                                                          | Serotype 17A                   | GTA GAC TTC TTA GAG CCT ATT<br>GTG G     |

|                  |                                |                                            |
|------------------|--------------------------------|--------------------------------------------|
| 17AReverse       | Serotype 17A                   | CAT TCG ACC AGA TAT AGG TAC<br>GAT         |
| 19B19CForward    | Serotypes 19B and<br>19C       | AGA ATT CGG AGA TTT GTG GTA<br>T           |
| 19B19CReverse    | Serotypes 19B and<br>19C       | CAA TCC ACC TCC ATA AAC GA                 |
| 21Forward        | Serotype 21                    | CAA TTC TAC TGA GTC CAT ATT<br>ATG AAA     |
| 21Reverse        | Serotype 21                    | ACC ATC GTA CCT GCA CCA TAA                |
| 23AForward       | Serotype 23A                   | TTT ACT TTA ATT TAT AGC TTT<br>TTG GCT AA  |
| 23AReverse       | Serotype 23A                   | GGT GCA TGA GTT AGG AGA AAG<br>TG          |
| 23BForward       | Serotype 23B                   | GGA TCG TTG TTC ATA GCG G                  |
| 23BReverse       | Serotype 23B                   | GAT AAT AAA GAA ATT ACT AAC<br>CAT GTC GT  |
| 24F24A24BForward | Serotypes 24F, 24A,<br>and 24B | TCA ACA CTT ATG ATG RTG CCT<br>G           |
| 24F24A24BReverse | Serotypes 24F, 24A,<br>and 24B | GCA GAA ACA AAR GTA AGA ATT<br>ATA GAT ATC |
| 25F25A38Forward  | Serotypes 25F, 25A,<br>and 38  | GAC TAC AAA CTG CGG TAG TAG<br>AAA TG      |
| 25F25A38Reverse  | Serotypes 25F, 25A,<br>and 38  | TGG AAC AAT TCT AAT CGT TAA<br>TAC G       |
| 27Forward        | Serotype 27                    | GCA GCC ACC TCT TCT CAT TC                 |
| 27Reverse        | Serotype 27                    | GGA AGG AAC AAC CCA ACA AT                 |
| 28F28AForward    | Serotypes 28F and<br>28A       | CAG AGT TTG GTC GAG GTT CCT<br>A           |
| 28F28AReverse    | Serotypes 28F and<br>28A       | GCT CAA CTT TAT TTC TCT AGA<br>ATA AAC A   |
| 29Forward        | Serotype 29                    | CCG AAA ATT GTT CAC AGG ATA<br>C           |
| 29Reverse        | Serotype 29                    | AGC TTT CTT TTG TAC GAC TCT<br>TTT A       |
| 31Forward        | Serotype 31                    | TGA AAA TCC CTT AGT GAC ATC<br>TG          |
| 31Reverse        | Serotype 31                    | GCC ATA ATC AAA AAT AAG TTA<br>GAC ATA A   |

|                  |                             |                                         |
|------------------|-----------------------------|-----------------------------------------|
| 32F32AForward    | Serotypes 32F and 32A       | GGT ATG CTT ACA ATG AGA CGC             |
| 32F32AReverse    | Serotypes 32F and 32A       | AAT TCG TTC CCG GAT AAG ATG             |
| 33B33D33CForward | Serotypes 33B, 33D, and 33C | TCG TTG GAT GAC AAA ACT CTT AC          |
| 33B33D33CReverse | Serotypes 33B, 33D, and 33C | CCT CCC TGA GCC AAA ATA AC              |
| 33CForward       | Serotype 33C                | CGA ATC GTC ATA AGG CAA AA              |
| 33CReverse       | Serotype 33C                | AAT AGG AGT AAC AAA GAG AAG CCT AA      |
| 34Forward        | Serotype 34                 | TTA AAA GTA TTA TTG GTA GTG ATT CTT TTG |
| 34Reverse        | Serotype 34                 | TGT AAA GAC ATT CCC TGT AGG C           |
| 35F47FForward    | Serotypes 35F and 47F       | ATA AAA AGA AAG TCT TTG CCA GAG         |
| 35F47FReverse    | Serotypes 35F and 47F       | CAA CTT TTG GAA GAT ACT GAA CAT AA      |
| 35A35C42Forward  | Serotypes 35A, 35C, and 42  | GGA GAC TRT TAA AAC TTT TTT CGT TC      |
| 35A35C42Reverse  | Serotypes 35A, 35C, and 42  | TTA AGT AAG TCT TCG CAA TCC AG          |
| 35BForward       | Serotype 35B                | CTA ATT TGG CTA TGA AGC TAA TCC C       |
| 35BReverse       | Serotype 35B                | TAA CTT AAA TAG GCA TTA ACA AAA TAG GT  |
| 36Forward        | Serotype 36                 | CAA TTT CCC CTT ATT CTG TAG TTC         |
| 36Reverse        | Serotype 36                 | TGG AGA TCC CCA AGA GAA AAT A           |
| 39Forward        | Serotype 39                 | ATT GGT TTG GGA ACT TGA TGT C           |
| 39Reverse        | Serotype 39                 | GCA ATA AGG CAA ATA AGG GAT AAT TA      |
| 41F41AForward    | Serotypes 41F and 41A       | TGA CAC TAT TTA TAA TTG CTT TAT CCT T   |
| 41F41AReverse    | Serotypes 41F and           | TAG CGA GAA ACT ATC TGC ATC             |

|                                                                                                        |                                                                            |                                            |
|--------------------------------------------------------------------------------------------------------|----------------------------------------------------------------------------|--------------------------------------------|
|                                                                                                        | 41A                                                                        | TTG                                        |
| 43Forward                                                                                              | Serotype 43                                                                | AGA TCA AAT GGT GGT ATT AGG<br>AA          |
| 43Reverse                                                                                              | Serotype 43                                                                | GGA ATA GAT CAT TAA CCC TAA<br>TGA AT      |
| 45Forward                                                                                              | Serotype 45                                                                | TAT GCA GGA AAT ATC CGA GAA<br>GG          |
| 45Reverse                                                                                              | Serotype 45                                                                | CCG TGA AAC AGA AAC GCT ATG                |
| 47AForward                                                                                             | Serotype 47A                                                               | TAT TTG CCA TAA CGG ACT CTA<br>GAA C       |
| 47AReverse                                                                                             | Serotype 47A                                                               | GCT AAA ATA ATA AAT AGC GAA<br>CTT ACT ACA |
| 48Forward                                                                                              | Serotype 48                                                                | GCA TTT GGA GTT ATT GCC CTA<br>C           |
| 48Reverse                                                                                              | Serotype 48                                                                | CGA CGG AAT CAA TAT AAA TAA<br>GTG ATA     |
| LytA primers included in the multiplex PCR for direct sample and sweep colony detection and serotyping |                                                                            |                                            |
| LytAForward                                                                                            | LytA-Viridans group of <i>Streptococcus</i> to include <i>S.pneumoniae</i> | ATCGAACTCTTRCGYAATCTA                      |
| LytAReverse                                                                                            | LytA-Viridans group of <i>Streptococcus</i> to include <i>S.pneumoniae</i> | TCAAACCTTRTCTTTTGGATAAGAR<br>C             |

\* Original sequences for the primers in the two enrichment PCRs except for the lytA specific ones are from supplementary references 1 and 2

\*\*All primers would have the sequence TCTATTGGGCTATGTCAC attached to the 5' end

### Supplementary references

- Kong, F, Brown, M, Sabananthan, A, Zeng, X, Gilbert, GL.** 2006. Multiplex PCR-based reverse line blot hybridization assay to identify 23 *Streptococcus pneumoniae* polysaccharide vaccine serotypes. *J. Clin. Microbiol.* **44**:1887-1891.

2. **Zhou, F, Kong, F, Tong, Z, Gilbert, GL.** 2007. Identification of Less-Common *Streptococcus pneumoniae* Serotypes by a Multiplex PCR-Based Reverse Line Blot Hybridization Assay. J Clin Microbiol. **45**:3411-3415.
